# Supplementary material for: Structural Equation Modeling (SEM): Gaming Disorder Mediating Untreated Attention Deficit Hyperactivity Disorder to Disruptive Mood Dysregulation
Source: Research Square preprint supplement (doi:10.21203/rs.3.rs-302297/v2), 2021-03-29
Supplement: Supplementary file 1 [file 2a2460f2d8a7ab59a1e6fc1e.docx]

**Table 1.** Comparisons of the baseline characteristics of the children with ADHD between IA and non-IA groups

|  | | Internet Addiction (CIAS ≥ 57) | | *p*-value |
| --- | --- | --- | --- | --- |
| No (n = 49) | Yes (n = 53) |
| Gender | Male | 38 (77.6%) | 32 (60.4%) | 0.087a |
|  | Female | 11 (22.4%) | 21 (39.6%) |  |
| School performance | Average | 24 (50.0%) | 23 (44.2%) | 0.689a |
|  | Bad | 24 (50.0%) | 29 (45.8%) |  |
| Interpersonal relationships | Good | 36 (75.0%) | 25 (48.1%) | 0.008a |
|  | Bad | 12 (25.0%) | 27 (51.9%) |  |
| Comorbid diagnoses |  |  |  |  |
| ODD | Yes | 34 (69.4%) | 45 (84.9%) | 0.096a |
|  | No | 15 (30.6%) | 8 (15.1%) |  |
| CD | Yes | 0 (0%) | 2 (3.8%) | 0.496a |
|  | No | 49 (100.0%) | 51 (96.2%) |  |
| DMDD | Yes | 26 (53.1%) | 42 (79.2%) | 0.006a |
|  | No | 23 (46.9%) | 11 (20.8%) |  |
| Anxiety | Yes | 0 (0.0%) | 1 (1.9%) | 1.000a |
|  | No | 49 (100.0%) | 52 (98.1%) |  |
| Adjustment disorder | Yes | 0 | 0 |  |
|  | No | 49 (48.0%) | 53 (52.0%) |  |
| Somatization | Yes | 3 (6.1%) | 3 (5.7%) | 1.000a |
|  | No | 46 (93.9%) | 50 (94.3%) |  |
| Tics | Yes | 5 (10.2%) | 3 (5.7%) | 0.476a |
|  | No | 44 (89.8%) | 50 (94.3%) |  |
| Tourett’s syndrome | Yes | 3 (6.1%) | 4 (7.5%) | 1.000a |
|  | No | 46 (93.9%) | 49 (92.5%) |  |
| Dyslalia | Yes | 0 (0.0%) | 1 (1.9%) | 1.000a |
|  | No | 49 (100.0%) | 52 (98.1%) |  |
| Speech delay history | Yes | 1 (2.0%) | 1 (1.9%) | 1.000a |
|  | No | 48 (98.0%) | 52 (98.1%) |  |
| Internet gaming | Yes | 18 (36.7%) | 49 (92.5%) | < 0.001a |
| disorder | No | 31 (63.3%) | 4 (7.5%) |  |
| Depression | Yes | 0 (0.0%) | 1 (1.9%) | 1.000a |
|  | No | 49 (100.0%) | 52 (98.1%) |  |

a: Fisher’s Exact test

b: Independent t-test

c: Mann-Whitney U test

**Table 1** (Continued)

|  | | Internet Addiction (CIAS ≥ 57) | | *p*-value |
| --- | --- | --- | --- | --- |
| No (n = 49) | Yes (n = 52) |
| Subtype | Combined | 35 (71.4%) | 30 (56.6%) | 0.150a |
|  | Inattentive | 14 (28.6%) | 23 (43.4%) |  |
| Family hereditary | Yes | 11 (22.4%) | 10 (18.9%) | 0.807a |
| history | No | 38 (77.6%) | 43 (81.1%) |  |
| Sibling suffer from | Yes | 11 (22.4%) | 9 (17.0%) | 0.619a |
| ADHD | No | 38 (77.6%) | 44 (83.0%) |  |
| Parents suffer from | Yes | 13 (26.5%) | 19 (35.8%) | 0.394a |
| ADHD in Childhood | No | 36 (73.5%) | 34 (64.2%) |  |
| Strategy of Parents | Appropriate | 31 (64.6%) | 23 (43.4%) | 0.046a |
| deal with stress | Inappropriate | 17 (35.4%) | 30 (56.6%) |  |
| Parental understanding | Yes | 21 (42.9%) | 21 (39.6%) | 0.841a |
| of ADHD | No | 28 (57.1%) | 32 (60.4%) |  |
| Parental marital | Satisfied | 43 (87.8%) | 38 (71.7%) | 0.053a |
| satisfaction | Unsatisfied | 6 (12.2%) | 15 (28.3%) |  |
| Working days online | ≥ 1Hr | 23 (46.9%) | 43 (81.1%) | < 0.001a |
| chat or play game | < 1Hr | 26 (53.1%) | 10 (18.9%) |  |
| Holiday online chat or | ≥ 3Hr | 21 (42.9%) | 45 (84.9%) | < 0.001a |
| play game | < 3Hr | 28 (57.1%) | 8 (15.1%) |  |
| Drug response | Good | 14 (50.0%) | 11 (31.4%) | 0.195a |
|  | Bad | 14 (50.0%) | 24 (68.6%) |  |
| Parenting group therapy | Yes | 7 (23.3%) | 8 (20.0%) | 0.775a |
|  | No | 23 (76.7%) | 32 (80.0%) |  |
| Compliance | Good | 13 (48.1%) | 10 (27.8%) | 0.118a |
|  | Bad | 14 (51.9%) | 26 (72.2%) |  |
| Age |  | 10.16 ± 3.05 | 12.29 ± 3.69 | 0.002b |
| Height |  | 138.80 ± 18.15 | 148.98 ± 18.71 | 0.007b |
| Weight |  | 35.89 ± 15.06 | 45.85 ± 18.24 | 0.003b |
| Age of father |  | 42.63 ± 6.30 | 46.76 ± 7.87 | 0.005b |
| Age of mother |  | 40.22 ± 7.25 | 43.53 ± 6.98 | 0.021b |
| No. of Comorbidity |  | 1.90 ± 1.21 | 2.89 ± 0.91 | < 0.001c |

a: Fisher’s Exact test

b: Independent t-test

c: Mann-Whitney U test

**Table 2** Zero-order correlations among study measures

|  | Inattention | Hyperactivity | Emotionality | CIAS | DMDD |
| --- | --- | --- | --- | --- | --- |
| Inattention | 1 | 0.476*** | 0.355*** | 0.270** | 0.177 |
| Hyperactivity |  | 1 | 0.508*** | 0.020 | 0.141 |
| Emotionality |  |  | 1 | 0.211* | 0.616*** |
| CIAS |  |  |  | 1 | 0.350*** |
| DMDD |  |  |  |  | 1 |

CIAS: Chen Internet Addiction Scale;

DMDD: Disruptive Mood Dysregulation Disorder

*: *p* < 0.05; **: *p* < 0.01; ***: *p* < 0.001
